# Supplementary material for: Triacylglycerol synthesis enhances macrophage inflammatory function
Source: PubMed Central journal article supplement (PMC7427976; doi:10.1038/s41467-020-17881-3), 2020-08-14
Supplement: 41467_2020_17881_MOESM1_ESM.pdf [file 41467_2020_17881_MOESM1_ESM.pdf]

**Triacylglycerol synthesis enhances macrophage inflammatory function**

**Castoldi et al.,**

**Supplementary information**

## Supplementary Figure 1

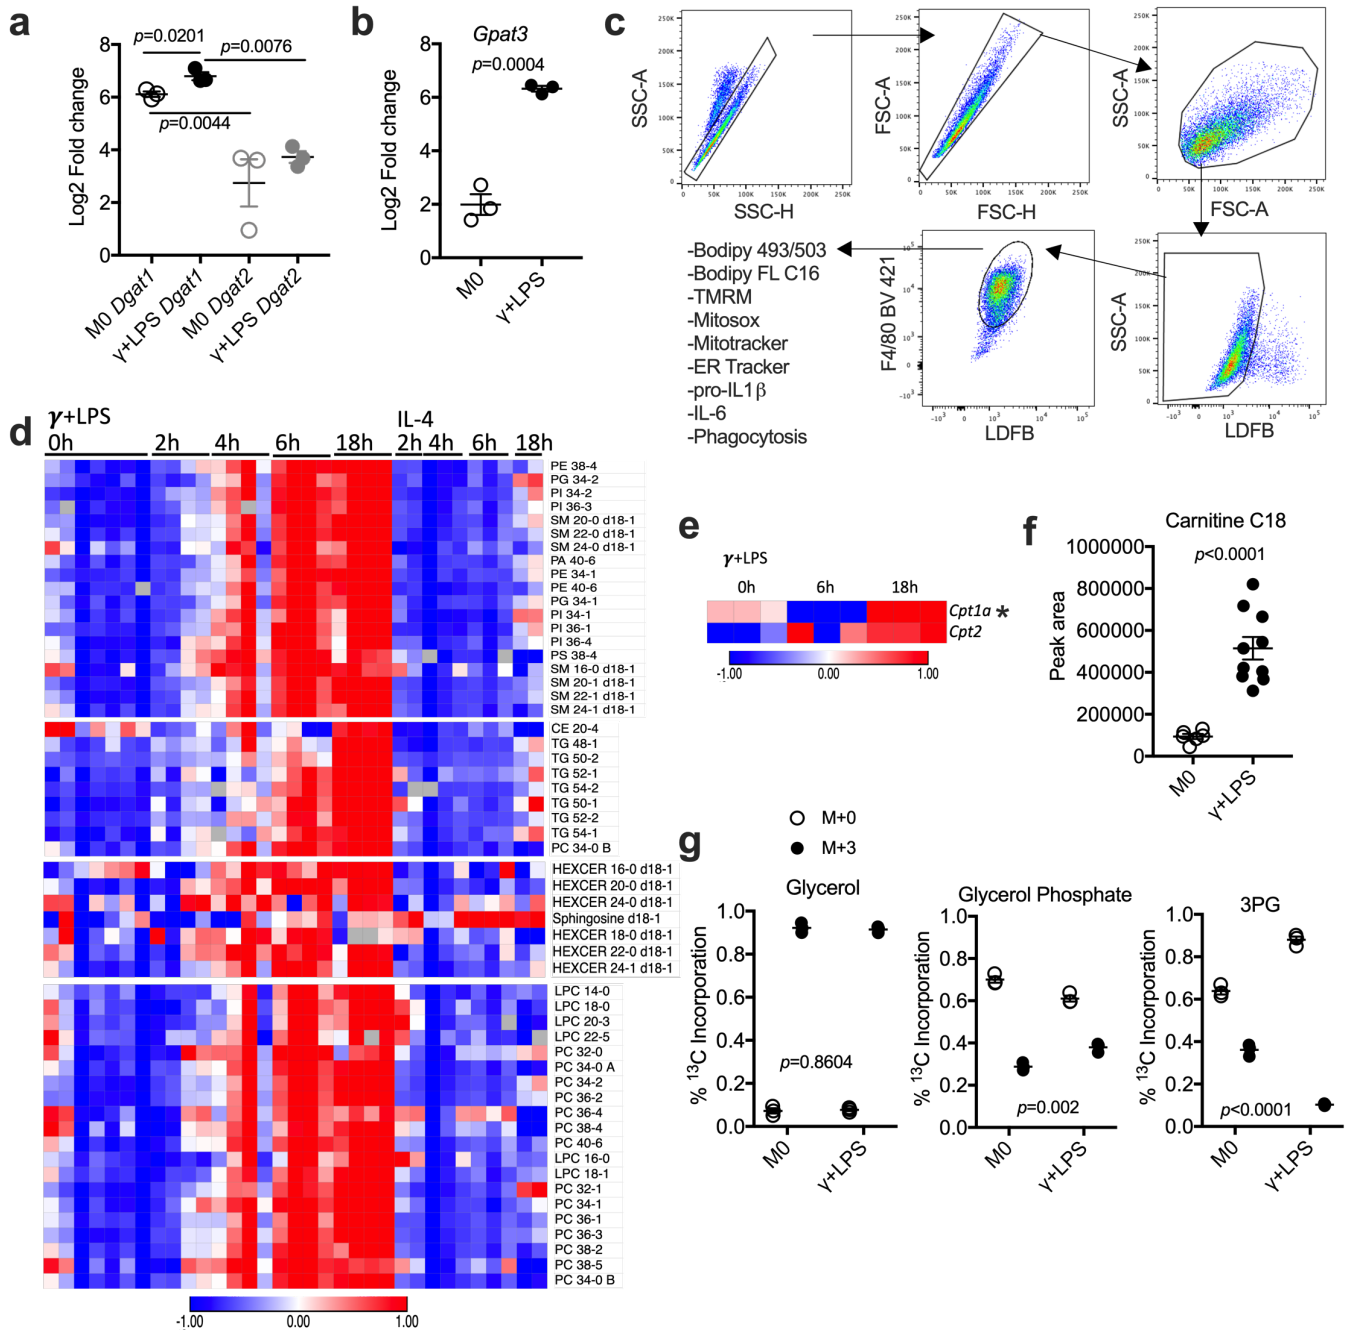

### Supplementary Figure 1: Increased *Dgat1* gene expression, lipid content and incorporation of glycerol into TG synthesis in inflammatory macrophages.

(a) *Dgat1* and *Dgat2* gene expression in macrophages treated without (M0) or with IFN $\gamma$  + LPS for 18 h. Data from RNAseq ( $n = 3$  biologically independent samples). (b) *Gpat3* gene expression in macrophages treated without (M0) or with IFN $\gamma$  + LPS for 18 h. Data from RNAseq ( $n = 3$  biologically independent samples). (c) Representative gating strategy used to identify live, F4/80<sup>+</sup> macrophages and further staining as indicated. LDFB: Live/Dead fixable blue staining. (d) Time-dependent accumulation of different lipid species in macrophages after 0, 2, 4, 6 and 18 h of IFN $\gamma$  + LPS or IL-4 stimulation. (e) *Cpt1a* and *Cpt2* expression in resting macrophages (0 h) and after 6 h or 18 h of stimulation with IFN $\gamma$  + LPS ( $\gamma$  + LPS). Data from RNA-seq. (f) C18 acylcarnitine measured using MS in M0 macrophages and macrophages stimulated with IFN $\gamma$  + LPS, for 18 h

(M0  $n = 6$ ,  $\gamma + \text{LPS}$   $n = 10$  biologically independent samples). **(g)** Fractional contribution of  $^{13}\text{C}$  Glycerol (M+3) during a 30 min pulse of labeling resting macrophages (M0) or macrophages stimulated with  $\text{IFN}\gamma + \text{LPS}$  for 18 h ( $n = 3$  biologically independent samples). Data are represented as mean values  $\pm$  s.e.m. One-way ANOVA with Bonferroni's multiple comparison test **(a, g)**; Unpaired two-tailed Student's t test **(b, f)**. ( $*p < 0.05$ ). (a-b) representative of one experiment. (d-g) representative of two experiments (c) representative of three experiments. Source data are provided as a Source Data file.

# Supplementary Figure 2

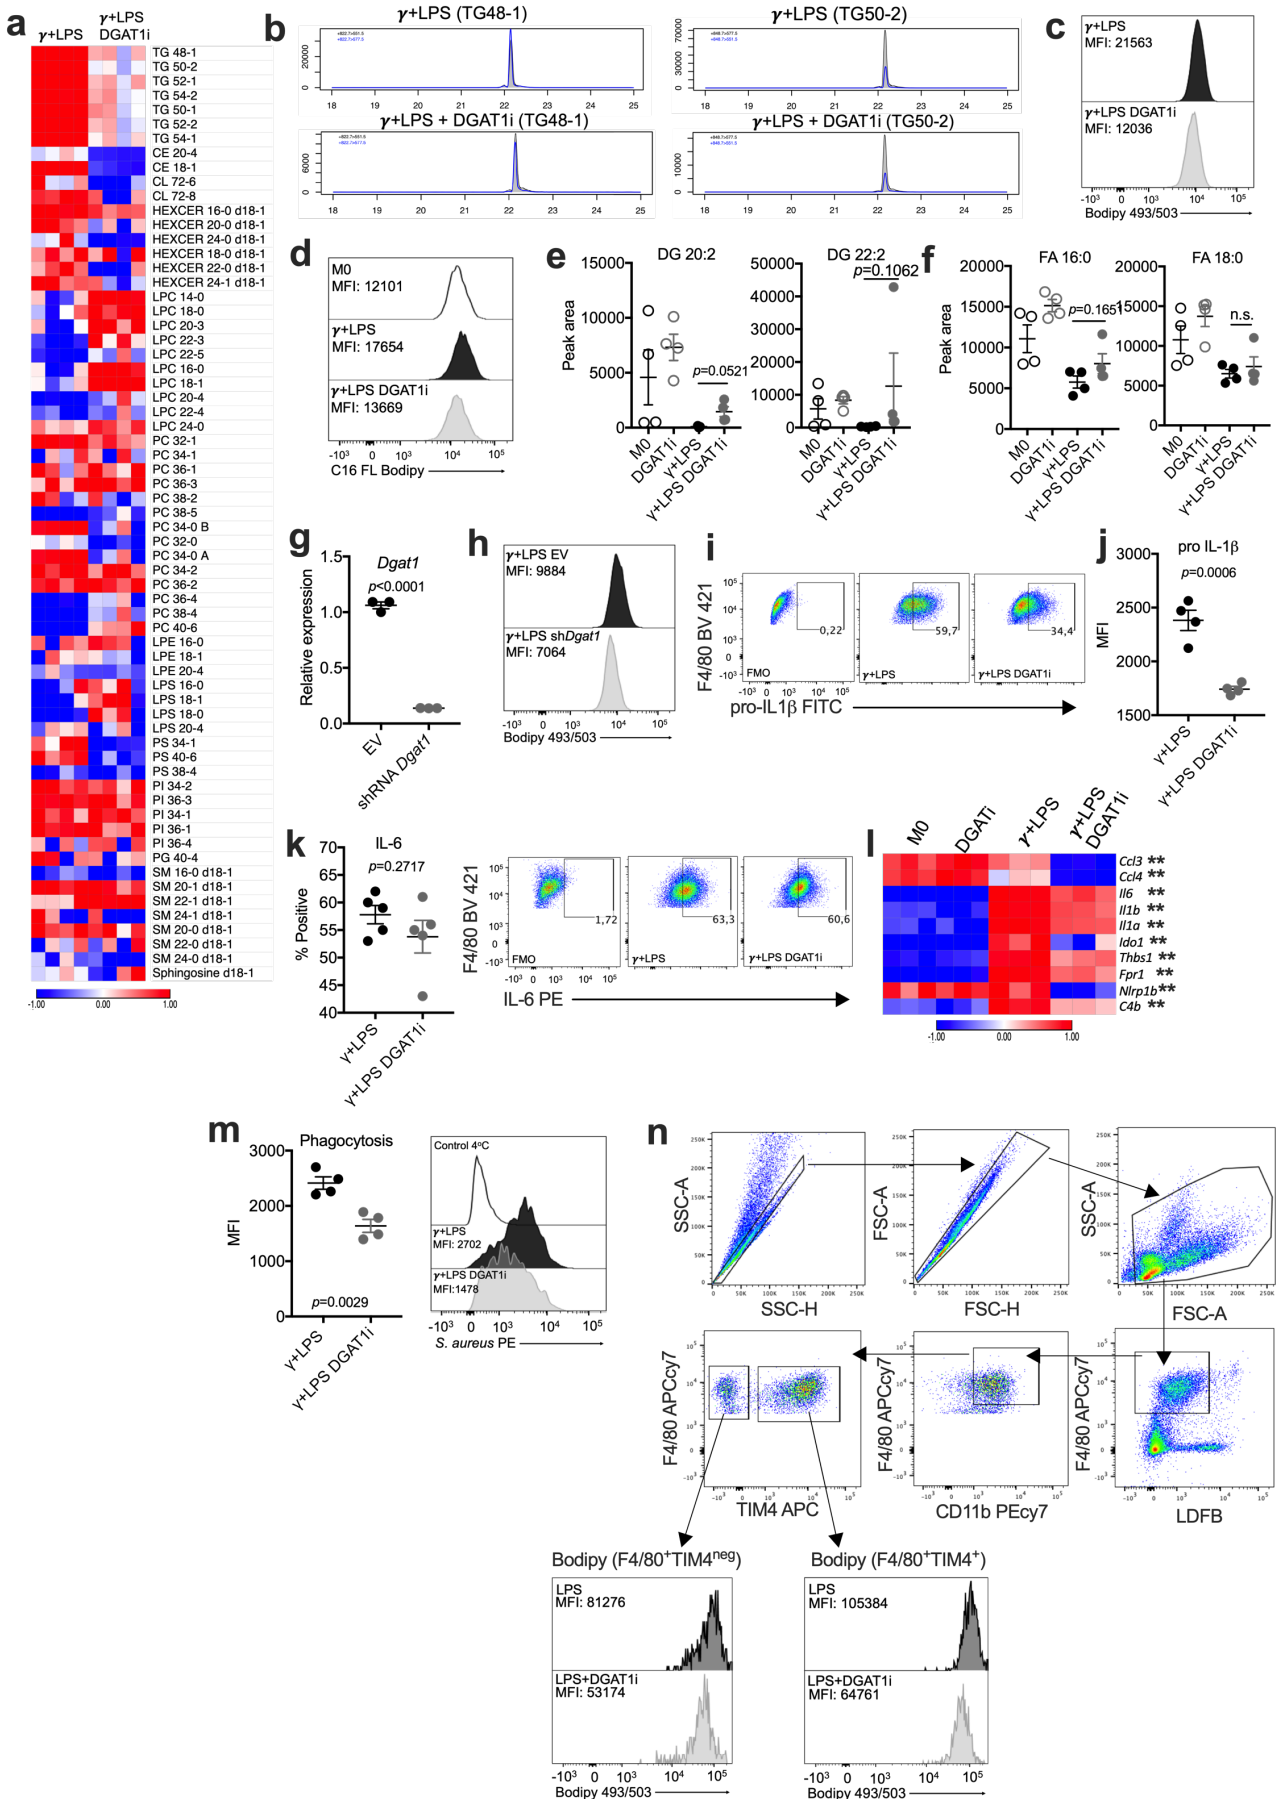

**Supplementary Figure 2: Changes in lipid content of inflammatory macrophages as a result of loss of DGAT1 function.**

**(a)** Lipidome at 18 h after addition of IFN $\gamma$  + LPS without or with DGAT1i. **(b)** Representative mass spectrum (MS) of TG48-1 and TG50-2, x-axis: mass/charge ratio, y-axis: signal intensity. **(c)** Representative histogram of Bodipy 493/503 staining after 18 h of culture with IFN $\gamma$  + LPS with or without DGAT1i. **(d)** Representative histogram of Bodipy FL C16 uptake after 18 h. **(e)** Effect of DGAT1i on DG (DG 20:2 and 22:2), and **(f)** FA (FA 16:0 and 18:0), in macrophages over 18 h of culture ( $n = 4$  biologically independent samples). **(g)** Validation of ability of sh*Dgat1* to suppress *Dgat1* gene expression after 3 days of puromycin selection ( $n = 3$  biologically independent samples). **(h)** Representative histogram of Bodipy 493/503 staining in macrophages transduced with empty vector or sh*Dgat1* and cultured with or without IFN $\gamma$  + LPS for 18 h. **(i)** Representative pro-IL1 $\beta$  intracellular staining (values are percentage), and **(j)** pro IL-1 $\beta$  production, (MFI, median fluorescence intensity), 6 h after stimulation with IFN $\gamma$  + LPS with or without DGAT1i ( $n = 4$  biologically independent samples). **(k)** IL-6 production, percentage cytokine-positive F4/80 $^+$  cells, 6 h after stimulation and representative IL-6 staining ( $n = 5$  biologically independent samples). **(l)** Down regulated genes related to cytokine production and immune system processes after 18 h. **(m)** Effects of DGAT1i on the ability of inflammatory macrophages to phagocytose *S. aureus* (PE-labelled). Data show MFI for *S.aureus* fluorescence in F4/80 $^+$  cells. Macrophages were stimulated with IFN $\gamma$  + LPS for 18 h with or without DAGT1i and then incubated with PE-labeled *S. aureus* (PE) for 30 min ( $n = 4$  biologically independent samples) and representative histogram. **(n)** Representative gating strategy to identify Bodipy 493/503 staining as indicated, (LDFB, Live/Dead fixable blue staining). Data are represented as mean values  $\pm$  s.e.m. One-way ANOVA with Bonferroni's multiple comparison test **(e-f)**; Unpaired two-tailed Student's t test **(g, j, k, m)**. (\*\* $p < 0.01$ ). (a-b, e-f, n) representative of two experiments, (c-d, g-k, m), representative of three experiments and (l) representative of one experiment. Source data are provided as a Source Data file.

### Supplementary Figure 3

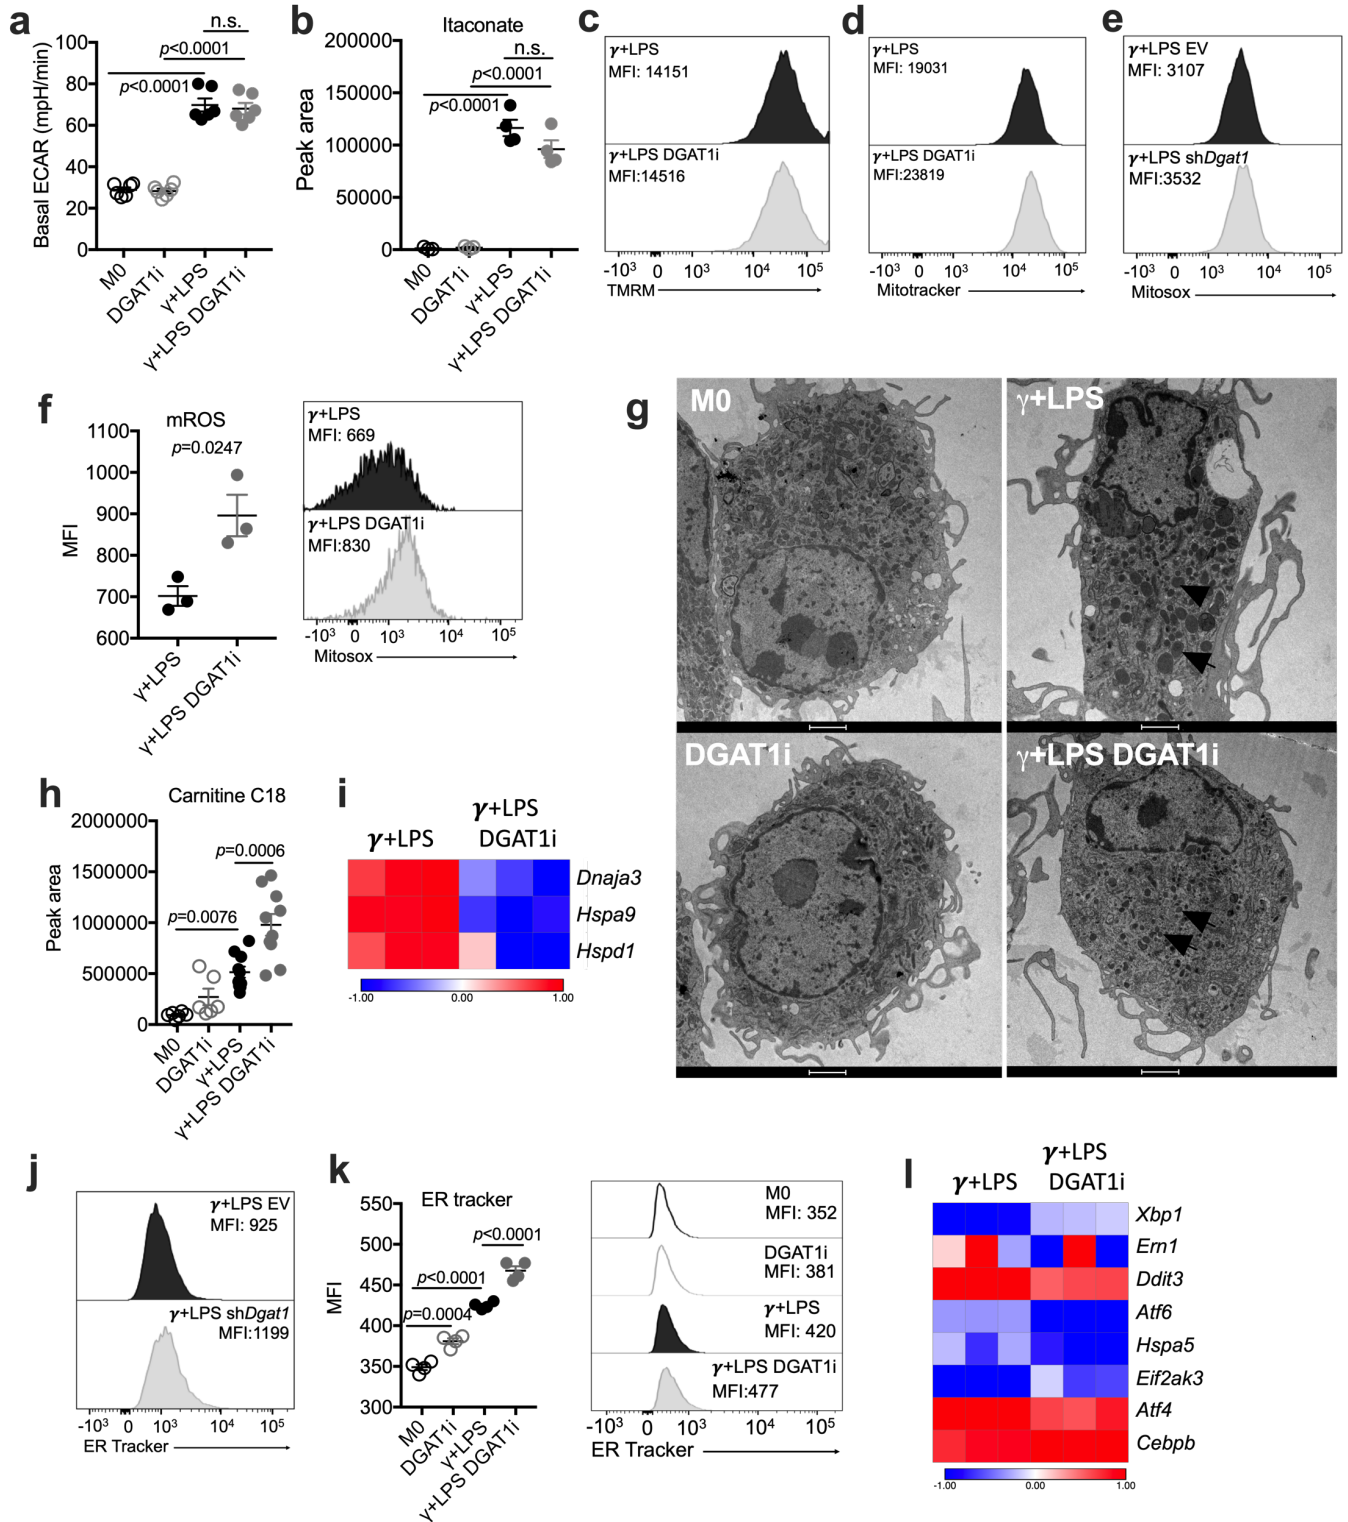

### Supplementary Figure 3: Loss of function of DGAT1 does not change overall cell metabolism in inflammatory macrophages.

(a) Basal ECAR of macrophages cultured with IFN $\gamma$  + LPS, or without (M0), with or without DGAT1i for 18 h ( $n = 6$  biologically independent samples) and (b) total pool of itaconate (M0 and DGAT1i  $n = 3$ ,  $\gamma$  + LPS and  $\gamma$  + LPS DGAT1i  $n = 4$  biologically independent samples). (c)

Representative histogram of TMRM and **(d)** Mitotracker deep red staining in macrophages after 18 h of culture with IFN $\gamma$  + LPS with or without DGAT1i, (MFI, median fluorescence intensity). **(e)** Representative histogram of Mitosox staining in macrophages transduced with empty vector or *shDgat1* and cultured with or without IFN $\gamma$  + LPS for 18 h, **(f)** Effects of DGAT1i on mitochondrial reactive oxygen species. Macrophages were cultured with IFN $\gamma$  + LPS for 18 h ( $n = 3$  biologically independent samples), and representative histogram. **(g)** Low magnification electron micrographs of resting (M0) macrophages or IFN $\gamma$  + LPS-stimulated macrophages, cultured with or without DGAT1i for 18 h; arrows are pointing to lipid droplets (LD) (scale bars represent 2  $\mu$ m). **(h)** Carnitine and C18-acylcarnitine in resting (M0) macrophages or IFN $\gamma$  + LPS-stimulated macrophages, cultured with or without DGAT1i for 18 h (M0 and DGAT1i  $n = 6$ ,  $\gamma$  + LPS and  $\gamma$  + LPS DGAT1  $n = 10$  biologically independent samples). **(i)** Endoplasmic reticulum (ER) stress response genes at 18 h post stimulation as measured using RNAseq. **(j)** Representative histogram of ER tracker staining in macrophages transduced with empty vector or *shDgat1* and cultured with or without IFN $\gamma$  + LPS for 18 h. **(k)** ER mass in macrophages cultured with IFN $\gamma$  + LPS, or without (M0), with or without DGAT1i for 18h ( $n = 4$  biologically independent samples) and representative histogram. **(l)** Mitochondrial unfolded protein response genes at 18 h post stimulation with IFN $\gamma$  + LPS without or with DGAT1i as measured using RNAseq. Data are represented as mean values  $\pm$  s.e.m. One-way ANOVA with Bonferroni's multiple comparison test **(a-b, h, k)**; Unpaired two-tailed Student's t test **(f)**. (a-f, h, j, k) representative of tree experiments and (g, i, l) representative of one experiment. Source data are provided as a Source Data file.

## Supplementary Figure 4

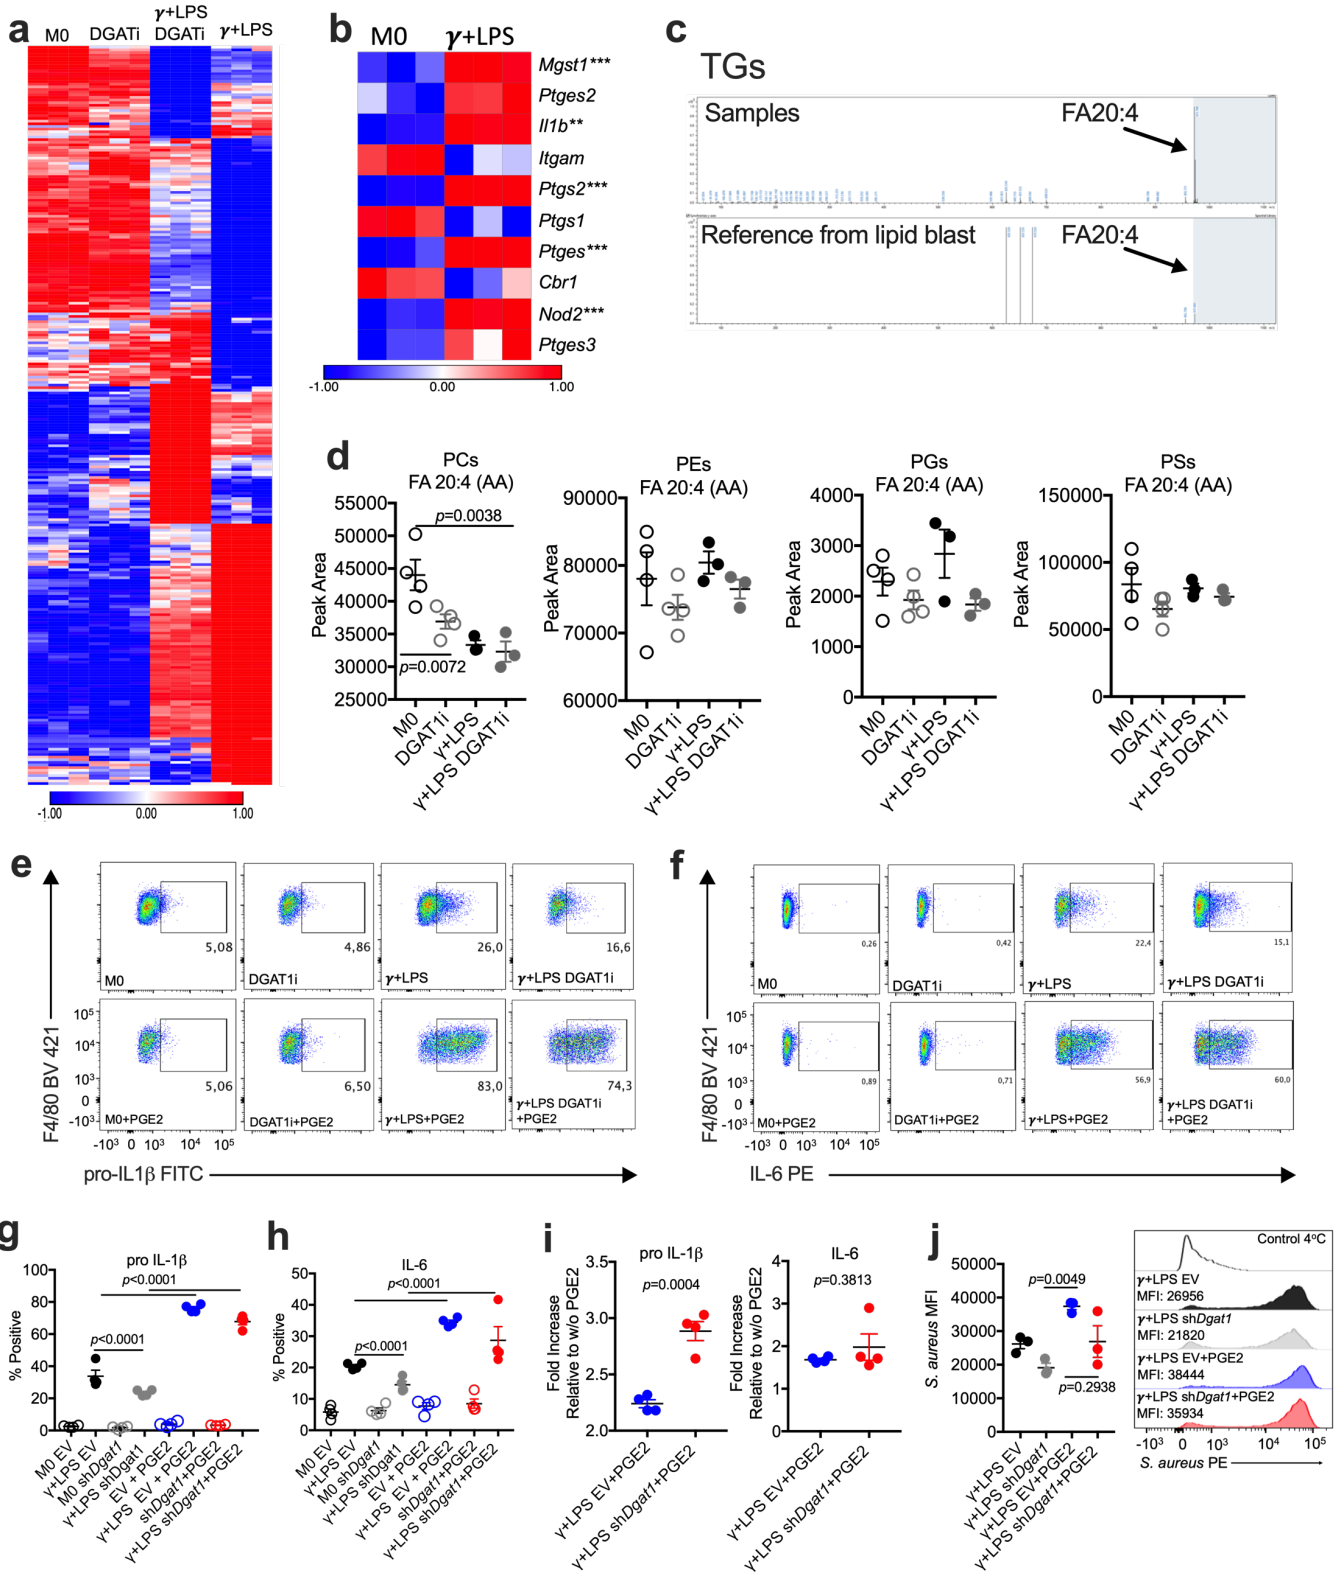

### Supplementary Figure 4.: Down- and up-regulated genes and pathways in macrophages with loss of function of *DGAT1*.

(a) Significantly regulated ( $p < 0.01$ ) genes in macrophages stimulated without (M0) or with IFN $\gamma$  + LPS for 18 h in the presence or absence of DGAT1i. 136 genes down-regulated and 149 genes up-regulated. Data from RNA-seq. (b) Prostaglandin-E synthase activity genes expression in resting (M0) and macrophages treated with IFN $\gamma$  + LPS for 18 h (\*\* $p < 0.01$ ; \*\*\* $p < 0.001$ ) data from



RNA-seq. **(c)** Representative TGs mass spectrum (MS) of FA 20:4 (arachidonic acid (AA)) from IFN $\gamma$  + LPS-stimulated macrophages cultured with or without DGAT1i for 18 h, x-axis :mass/charge ratio, y-axis: signal intensity. The MS shown is a combination of all the samples from this experiment. **(d)** PCs, PEs, PGs and PSs containing FA 20:4 (AA) at 18 h (M0 and DGAT1i  $n = 4$ ,  $\gamma$  + LPS and  $\gamma$  + LPS DGAT1i  $n = 3$  biologically independent samples). **(e)** pro-IL1 $\beta$  and **(f)** IL-6 representative intracellular staining in macrophages 6 h after stimulation with IFN $\gamma$  + LPS with or without DGAT1i and/or exogenous PGE2. PGE2 was added 1 h after IFN $\gamma$  + LPS or IFN $\gamma$  + LPS + DGAT1i, and cells were collected 5 h later (values are percentages). **(g, h)** Macrophages were transduced with empty vector (EV) or sh*Dgat1* and cultured with or without IFN $\gamma$  + LPS, with or without exogenous PGE2 (added 1 h after IFN $\gamma$  + LPS) for 5 h. Pro IL-1 $\beta$  **(g)** or IL-6 **(h)** positive macrophages (percentage cytokine-positive F4/80 $^+$  cells, are shown ( $n = 4$  biologically independent samples). **(i)** Fold increases in pro IL-1 $\beta$  and IL-6 production (measured as percentage cytokine-positive F4/80 $^+$  cells) induced by exogenous PGE2 in macrophages ( $n = 4$  biologically independent samples). **(j)** Effect of PGE2 on the ability of EV- or sh*Dgat1*-transduced macrophages to phagocytose *S. aureus* (PE-labelled) after simulation with IFN $\gamma$  + LPS. Data show MFI values of *S.aureus*-associated fluorescence in F4/80 $^+$  cells ( $n = 3$  biologically independent samples) and representative histograms, (MFI, median fluorescence intensity). Data are represented as mean values  $\pm$  s.e.m. One-way ANOVA with Bonferroni's multiple comparison test **(d, g-h, j)**; Unpaired two-tailed Student's t test **(i)**. (a-d) representative of one experiment, (e-j) representative of two experiments. Source data are provided as a Source Data file.
